# Supplementary material for: Growth Suppression in Lung Cancer Cells Harboring EGFR-C797S Mutation by Quercetin
Source: MDPI journal article supplement (doi:10.3390/biom11091271), 2021-08-25
Supplement: s1 [file s1]

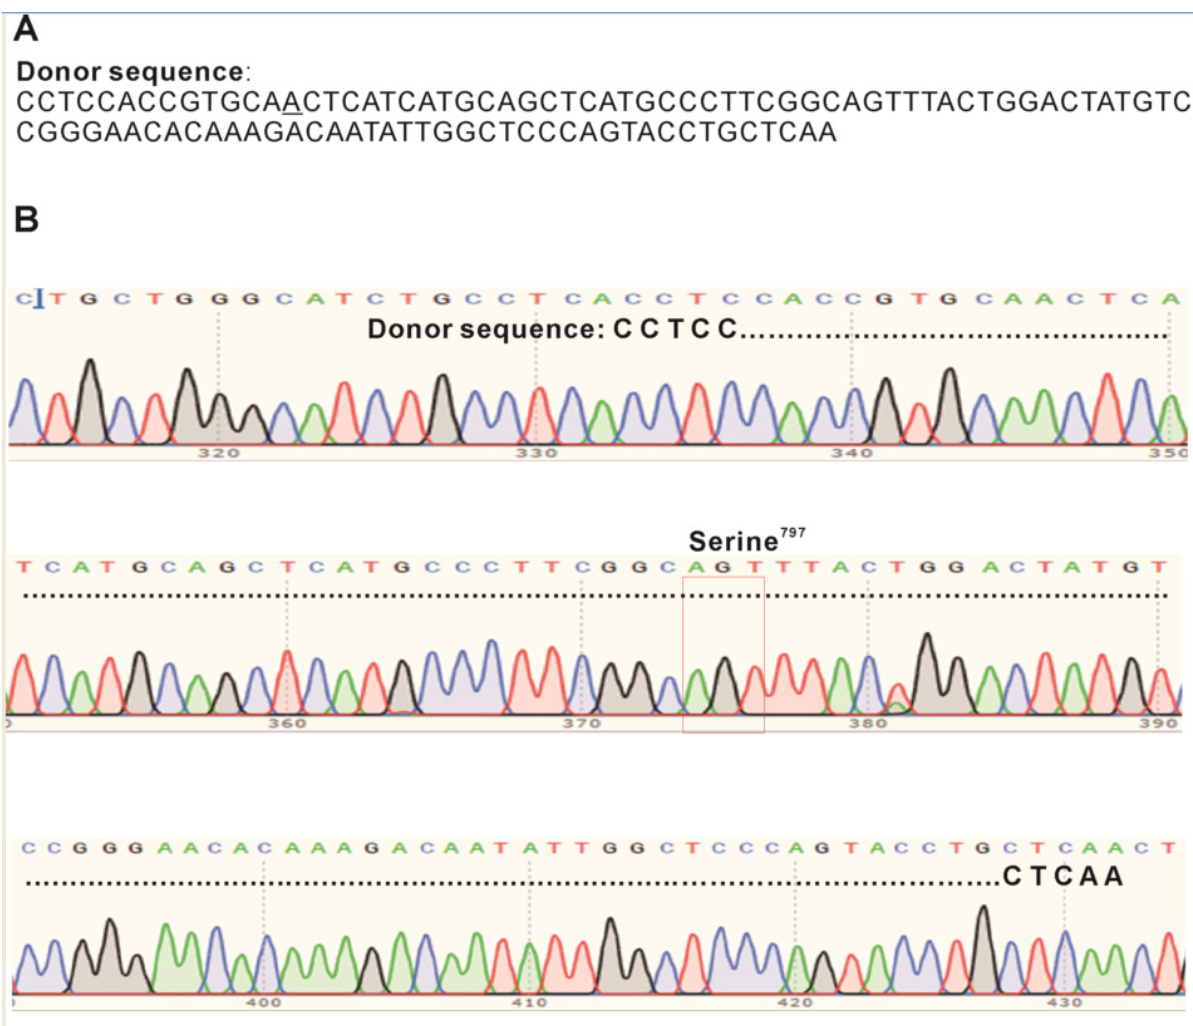

**Figure S1.** (A) The donor DNA, which contains the mutation of EGFR C797S and its right and left homologous arms, was used to replace the C797 sequence via homology-directed repair. (B) Sequencing chromatograms of the 100-nt donor DNA region in H1975-MS35 cells.

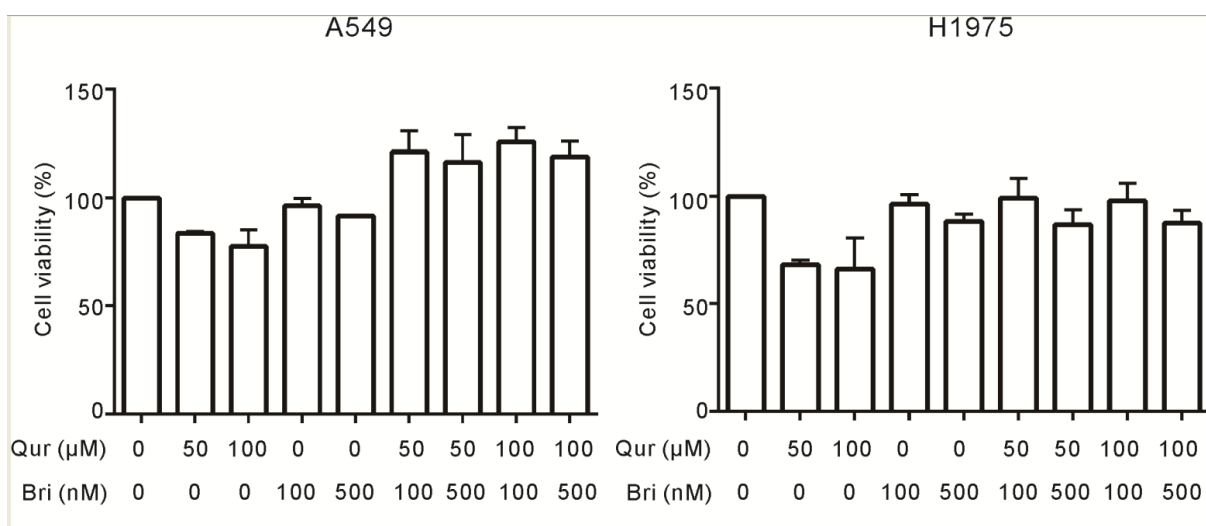

**Figure S2.** Effects of quercetin and brigatinib on the growth of H1975 and A549 cells. Cells were treated with various concentrations of quercetin and/or brigatinib for 24 h. The viability of the treated cells was determined with trypan blue staining assays. The data are presented as the mean  $\pm$  SD.

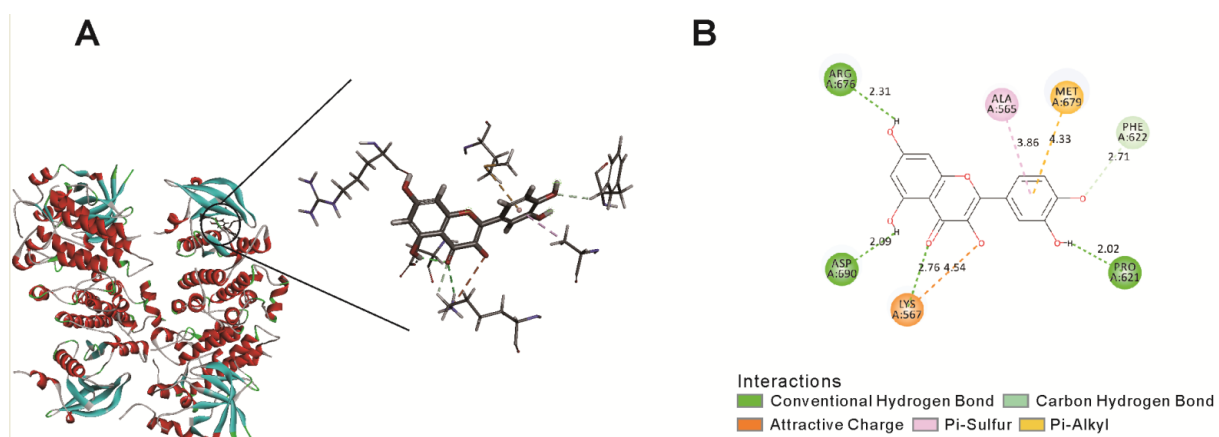

**Figure S3.** (A) The binding residues of quercetin and AXL. (B) Two-dimensional diagram showing the conventional hydrogen bond to Lys567, Pro621, Arg679, and Asp690 (green dashed lines), and the Pi-alkyl interaction to Ala565 (the pink dashed lines), and Pi-sulfur interaction to Met679 (orange dashed lines).
